# Supplementary material for: Turn-on fluorescent detection of melamine based on Ag nanoclusters–Hg2+ system
Source: Royal Society of Chemistry journal article supplement (doi:10.1039/c6nj01338d), 2016-01-01
Supplement: c6nj01338d1.pdf [file c6nj01338d1.pdf]

## Supplementary Information for

### Turn-on fluorescent detection of melamine based on Ag nanoclusters-Hg<sup>2+</sup> system

Qianqian Du <sup>a,b</sup>, Fei Qu <sup>a,b\*</sup>, Beibei Mao <sup>a,b</sup>, Shuyun Zhu <sup>a,b</sup> and Jinmao You <sup>a,b,c\*</sup>

<sup>a</sup> The Key Laboratory of Life-Organic Analysis, Qufu Normal University, Qufu 273165, Shandong, China

<sup>b</sup> Key Laboratory of Pharmaceutical Intermediates and Analysis of Natural Medicine, Qufu Normal University, Qufu 273165, Shandong, China

<sup>c</sup> Northwest Institute of Plateau Biology, Chinese Academy of Sciences, Xining 810001, China

Tel.: +86 537 4456305; Fax: +86 537 4456305.

\* Corresponding authors: [qufei3323@163.com](mailto:qufei3323@163.com); [jmyou6304@163.com](mailto:jmyou6304@163.com)

<sup>1</sup> Fei Qu and Qianqian Du contributed equally to this work.

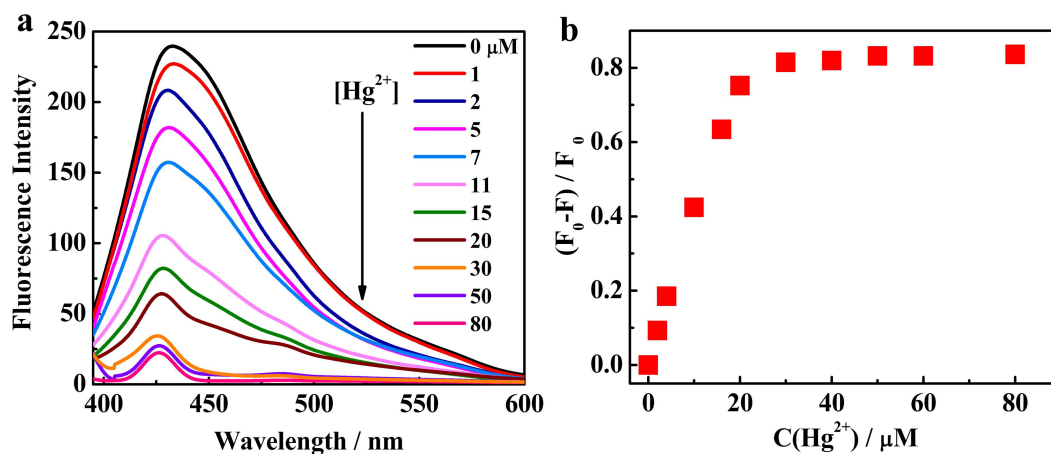

**Fig. S1.** Fluorescence spectra (a) and quenching efficiency (b) of Ag NCs in the presence of different concentrations of  $\text{Hg}^{2+}$ .  $F$  and  $F_0$  were the maximum emission intensities of Ag NCs in the presence and absence of  $\text{Hg}^{2+}$ , respectively.

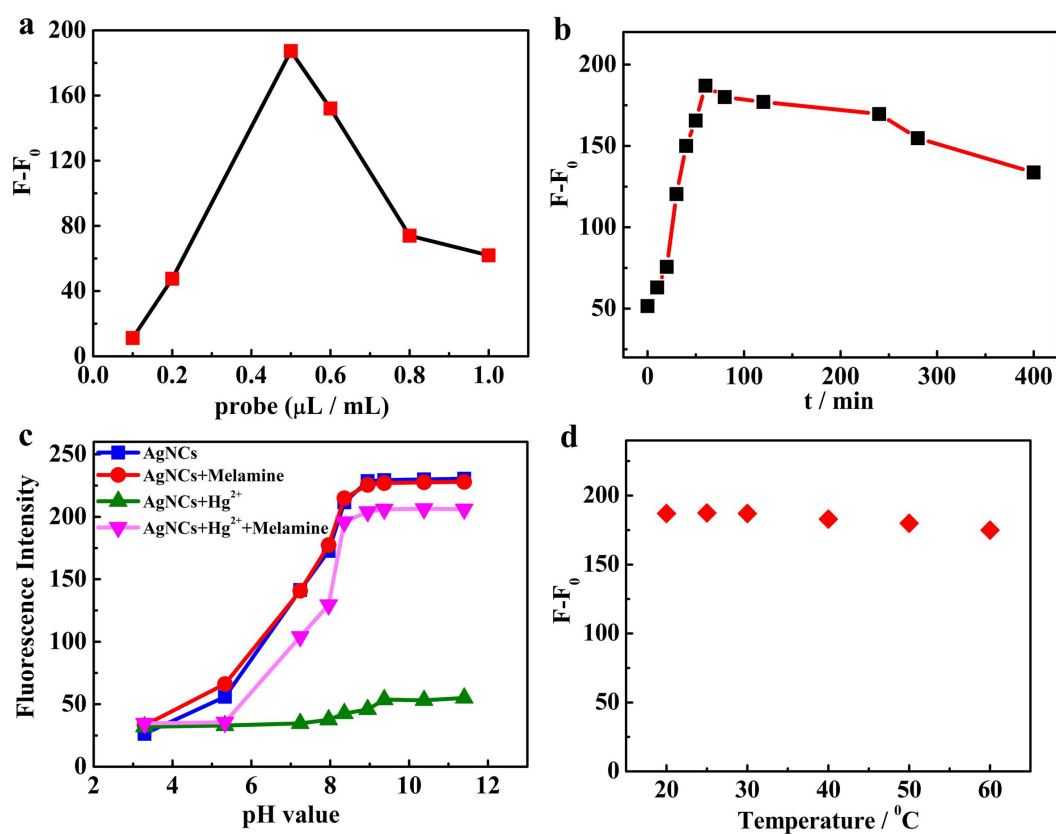

**Fig. S2.** Optimization of reaction conditions for detecting melamine based on Ag NCs- $\text{Hg}^{2+}$  system (a, probe concentration; b, reaction time; c, pH value; d, temperature). The final concentration of  $\text{Hg}^{2+}$  and melamine were 30 and 30  $\mu\text{M}$ , respectively.

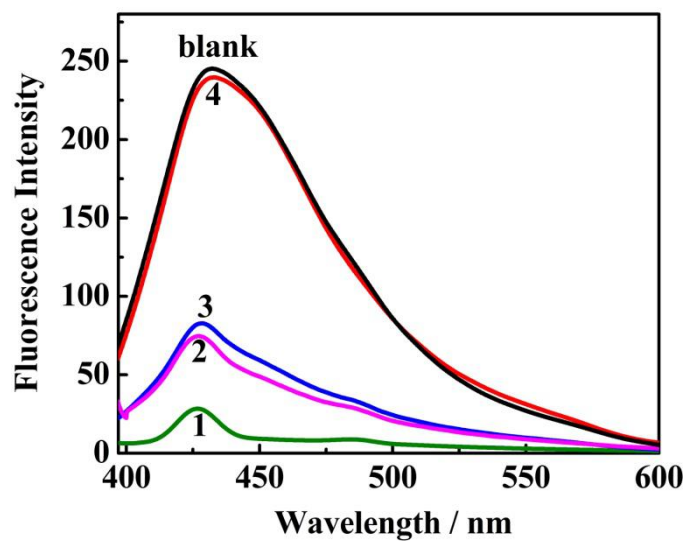

**Fig. S3.** Influence of addition order on the fluorescence response of melamine. Order 1: Ag NCs were incubated with  $\text{Hg}^{2+}$  for 10 min without addition of melamine; order 2: Ag NCs were pre-incubated with  $\text{Hg}^{2+}$  for 10 min and then melamine was added; order 3:  $\text{Hg}^{2+}$ , melamine and Ag NCs were added together; order 4: melamine was pre-incubated with  $\text{Hg}^{2+}$  for 1 h followed by the addition of Ag NCs. The concentration of  $\text{Hg}^{2+}$  and melamine were 30 and 30  $\mu\text{M}$ , respectively. Blank was the fluorescence of Ag NCs without  $\text{Hg}^{2+}$  and melamine.

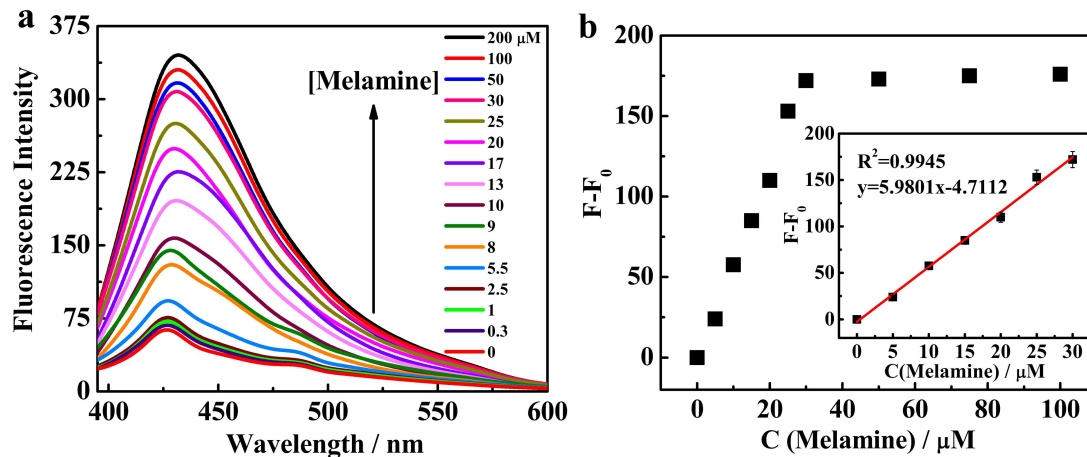

**Fig. S4.** Fluorescence spectra of Ag NC-PEI 1300 in the presence of different concentrations of melamine (a) and the corresponding linear range (b) (The inset displayed the linear range for 0.13 to 30  $\mu\text{M}$  melamine).

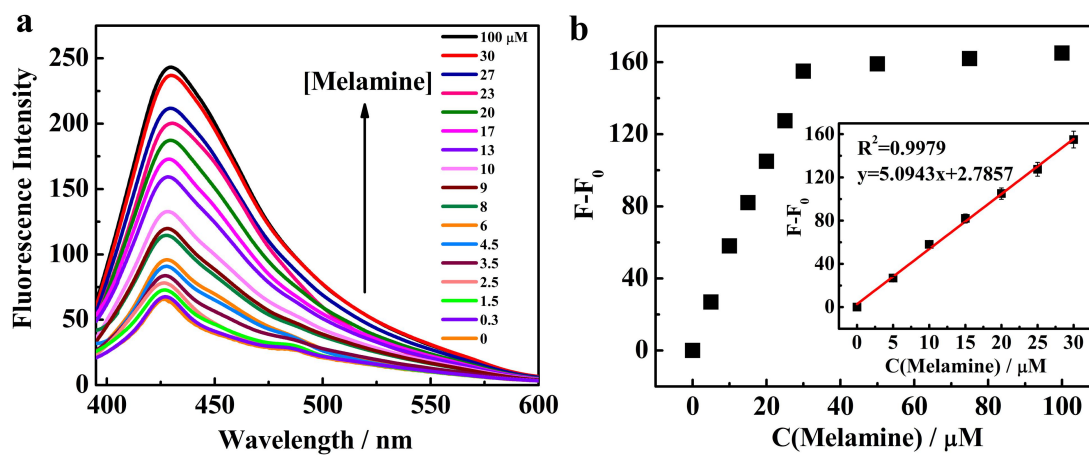

**Fig. S5.** Fluorescence spectra of Ag NC-PEI 1800 in the presence of different concentrations of melamine (a) and the corresponding linear range (b) (The inset displayed the linear range for 0.15 to 30  $\mu\text{M}$  melamine).

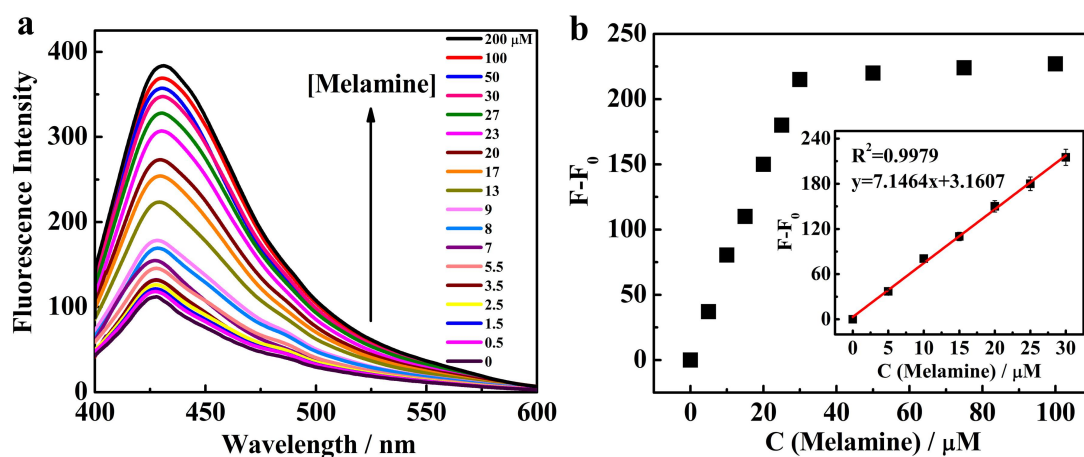

**Fig. S6.** Fluorescence spectra of Ag NC-PEI 2000 in the presence of different concentrations of melamine (a) and the corresponding linear range (b) (The inset displayed the linear range for 0.30 to 30  $\mu\text{M}$  melamine).

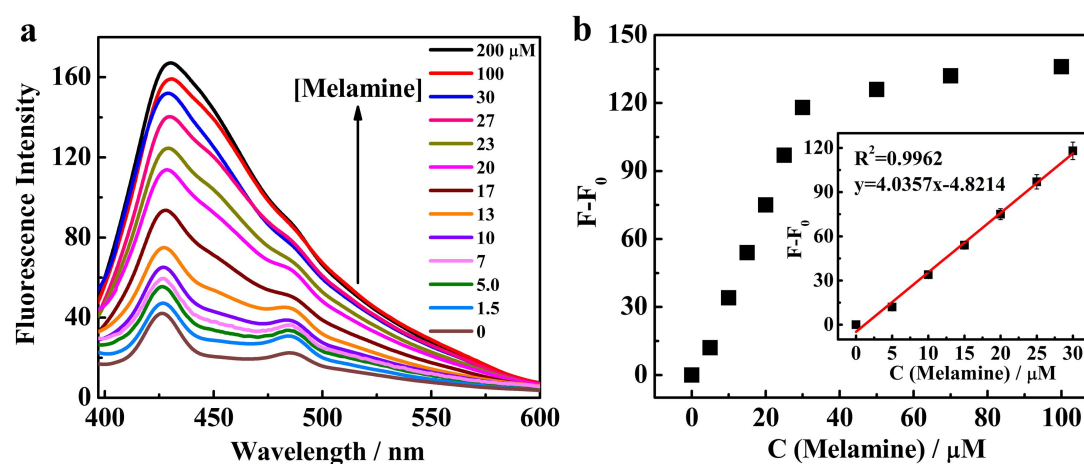

**Fig. S7.** Fluorescence spectra of Ag NC-PEI 10000 in the presence of different concentrations of melamine (a) and the corresponding linear range (b) (The inset displayed the linear range for 0.40 to 30  $\mu\text{M}$  melamine).

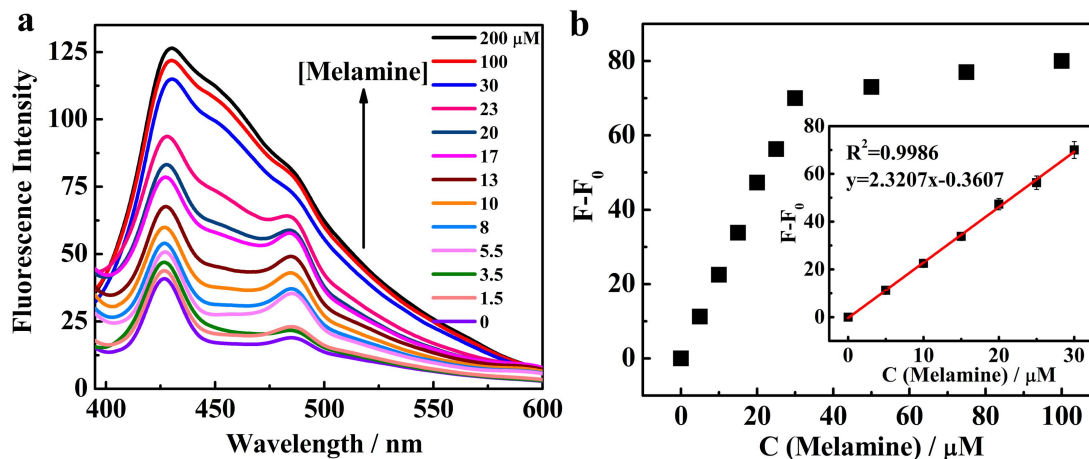

**Fig. S8.** Fluorescence spectra of Ag NC-PEI 25000 in the presence of different concentrations of melamine (a) and the corresponding linear range (b) (The inset displayed the linear range for 0.45 to 30  $\mu\text{M}$  melamine).

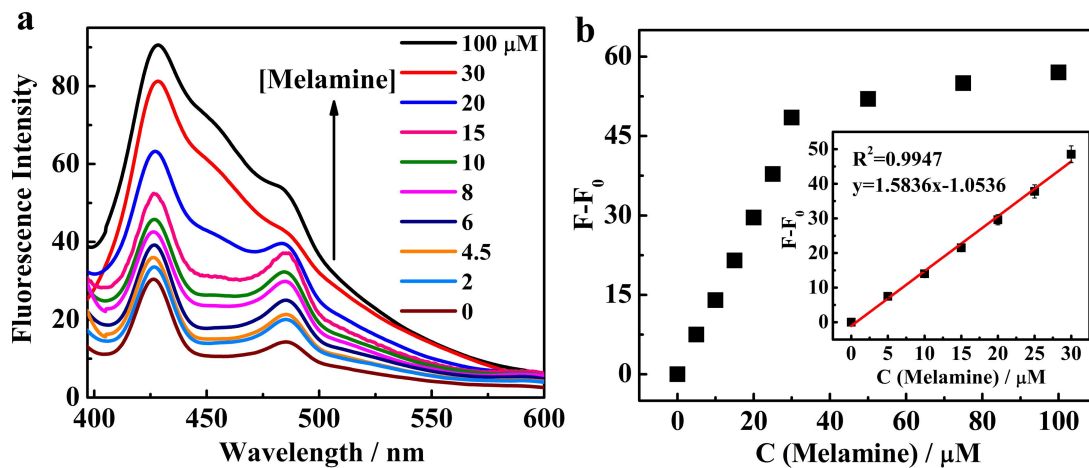

**Fig. S9.** Fluorescence spectra of Ag NC-PEI 70000 in the presence of different concentrations of melamine (a) and the corresponding linear range (b) (The inset displayed the linear range for 0.50 to 30  $\mu\text{M}$  melamine).

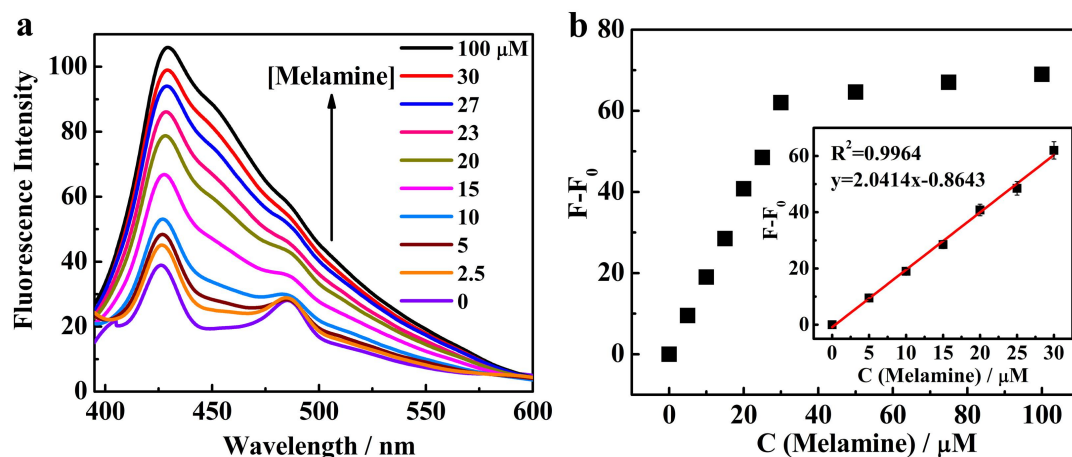

**Fig. S10.** Fluorescence spectra of Ag NC-PEI 750000 in the presence of different concentrations of melamine (a) and the corresponding linear range (b) (The inset displayed the linear range for 0.60 to 30 μM melamine).

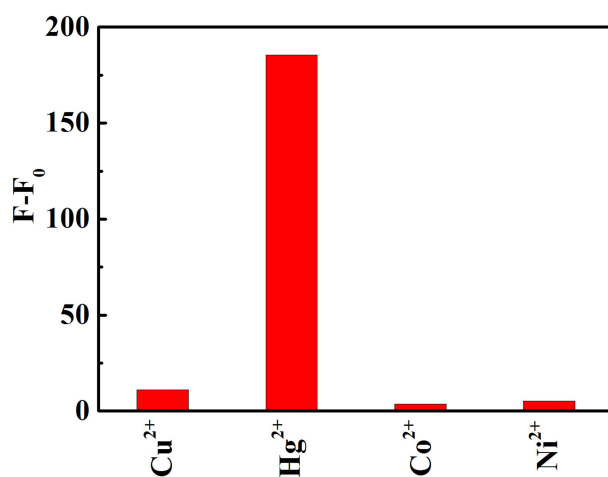

**Fig. S11.** Fluorescence recovery of Ag NCs with addition of melamine based on Ag NCs-metal ion systems. The concentrations of Cu<sup>2+</sup>, Hg<sup>2+</sup>, Co<sup>2+</sup> and Ni<sup>2+</sup> were 30 μM, and melamine was 30 μM.

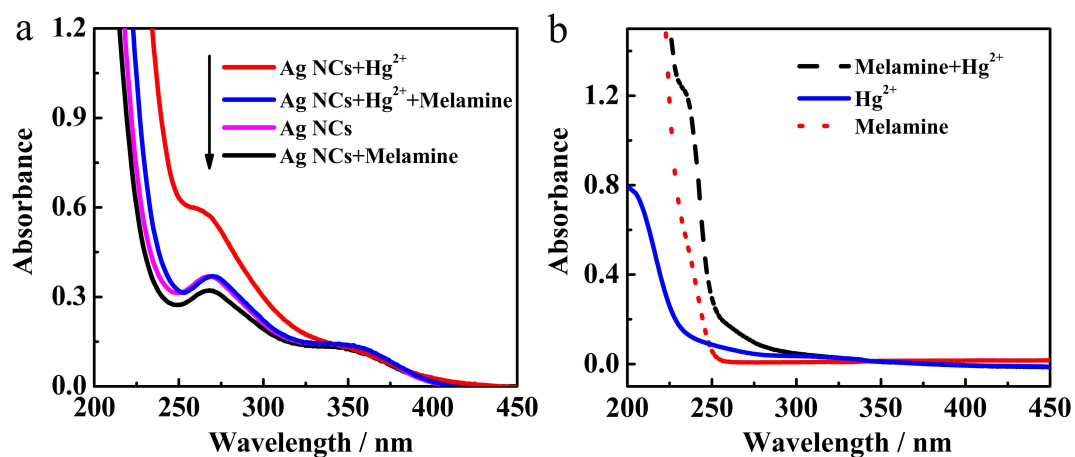

**Fig. S12.** (a) UV-vis spectra of Ag NCs, Ag NCs-Hg<sup>2+</sup> system, Ag NCs-Hg<sup>2+</sup>-Melamine complex, and Ag NCs-Melamine in aqueous solution; (b) UV-vis spectra of Hg<sup>2+</sup> (stright line), Melamine (dot line), and Melamine-Hg<sup>2+</sup> complex (dash line).

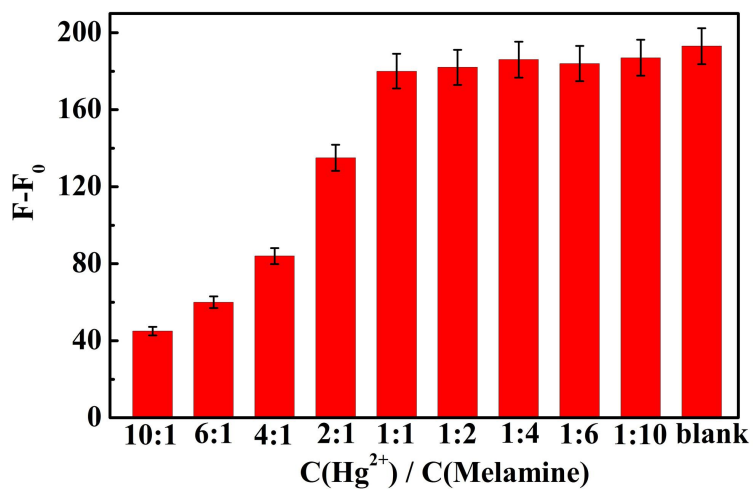

**Fig. S13.** Fluorescence intensity of different molar ratio between Hg<sup>2+</sup> and melamine. Blank was the fluorescence of Ag NCs without Hg<sup>2+</sup> and melamine. The concentration of Hg<sup>2+</sup> was 30 μM.



**Table S1.** The influence of molecular weights of PEI on the detection of melamine based on Ag NCs-Hg<sup>2+</sup> system.

| Ag NC-PEIs       | Linear range      | Linear equation    | LOD          |
|------------------|-------------------|--------------------|--------------|
| Ag NC-PEI 600    | 0.10 - 30 $\mu$ M | $y=7.4654x-2.8013$ | 30 nM        |
| Ag NC-PEI 1300   | 0.13 - 30 $\mu$ M | $y=5.9801x-4.7112$ | 45 nM        |
| Ag NC-PEI 1800   | 0.15 - 30 $\mu$ M | $y=5.0943x+2.7857$ | 75 nM        |
| Ag NC-PEI 2000   | 0.30 - 30 $\mu$ M | $y=7.1464x+3.1607$ | 0.10 $\mu$ M |
| Ag NC-PEI 10000  | 0.40 - 30 $\mu$ M | $y=4.0357x-4.8214$ | 0.13 $\mu$ M |
| Ag NC-PEI 25000  | 0.45 - 30 $\mu$ M | $y=2.3207x-0.3607$ | 0.16 $\mu$ M |
| Ag NC-PEI 70000  | 0.50 - 30 $\mu$ M | $y=1.5836x-1.0536$ | 0.19 $\mu$ M |
| Ag NC-PEI 750000 | 0.60 - 30 $\mu$ M | $y=2.0414x-0.8643$ | 0.23 $\mu$ M |

**Table S2.** Comparison of different methods for the determination of melamine.

| Methods              | Probes                                                                              | Linear range ( $\mu\text{M}$ ) | LOD ( $\mu\text{M}$ ) | References |
|----------------------|-------------------------------------------------------------------------------------|--------------------------------|-----------------------|------------|
| Molecular imprinting | CdTe quantum dots                                                                   | 0.1-0.8                        | 0.04                  | 26         |
| Molecular imprinting | -                                                                                   | 0.63-110                       | 0.068                 | 27         |
| Colorimetric         | Fe <sub>3</sub> O <sub>4</sub><br>nanoparticles-H <sub>2</sub> O <sub>2</sub> -ABTS | 2.0-40.0                       | 2                     | 28         |
| Colorimetry          | Au nanoparticles                                                                    | -                              | 7.9                   | 29         |
| Colorimetry          | label-free Ag nanoparticles                                                         | 4.0-170                        | 2.32                  | 30         |
| Colorimetry          | Ag nanoparticles<br>functionalized with sulfanilic<br>acid                          | 0.1-3.1                        | 0.011                 | 22         |
| Fluorescence         | CdTe@SiO <sub>2</sub> -Au nanoparticles                                             | 0.0075-0.35                    | 0.89                  | 20         |
| Fluorescence         | CdTe quantum dots                                                                   | 0.792-9.50                     | 0.31                  | 31         |
| Fluorescence         | Au nanoclusters                                                                     | 0.5-10                         | 0.15                  | 17         |
| Fluorescence         | Graphene quantum dots                                                               | 0.15-20                        | 0.12                  | 16         |
| Fluorescence         | Ag NC-PEI 600-Hg <sup>2+</sup> system                                               | 0.1-30                         | 0.03                  | This work  |

**Table S3.** Detection of melamine in raw milk, infant formula and dog food based on Ag NC-PEI 600-Hg<sup>2+</sup> system.

| Sample           | Concentration of melamine ( $\mu\text{M}$ ) |                  | Recovery (%) | RSD (n=3,%) |
|------------------|---------------------------------------------|------------------|--------------|-------------|
|                  | Amount added                                | Amount found     |              |             |
| Raw milk 1       | 0                                           | not found        | -            | -           |
| Raw milk 2       | 3                                           | 3.03 $\pm$ 0.08  | 101          | 2.94        |
| Raw milk 3       | 15                                          | 14.46 $\pm$ 0.21 | 96           | 1.48        |
| Raw milk 4       | 28                                          | 27.03 $\pm$ 0.25 | 97           | 0.93        |
| Infant formula 1 | 0                                           | not found        | -            | -           |
| Infant formula 2 | 3                                           | 2.92 $\pm$ 0.08  | 97           | 3.01        |
| Infant formula 3 | 15                                          | 14.38 $\pm$ 0.26 | 96           | 1.81        |
| Infant formula 4 | 28                                          | 27.67 $\pm$ 0.11 | 99           | 0.39        |
| Dog food 1       | 0                                           | not found        | -            | -           |
| Dog food 2       | 3                                           | 2.91 $\pm$ 0.07  | 97           | 2.56        |
| Dog food 3       | 15                                          | 14.82 $\pm$ 0.11 | 99           | 0.73        |
| Dog food 4       | 28                                          | 27.21 $\pm$ 0.17 | 97           | 0.62        |
